# Supplementary material
Source: Elsevier journal article supplement (https://www.sciencedirect.com/science/article/pii/S0211699522000790)
Supplement: mmc1 [file S0211699522000790:mmc1.doc]

**Supplementary material**

| **Table S1. Sensitive analysis for GFR outcome** | | | | |
| --- | --- | --- | --- | --- |
| **Study omitted** | **WMD** | **95% CI** | **I2 (%)** | ***P-* value*** |
| Badve et al. 2020 | 2.18 | 0.49 to 3.86 | 95.1 | <0.001 |
| Beddhu et al. 2016 | 2.12 | 0.44 to 3.80 | 95.5 | <0.001 |
| Doria et al. 2020 | 2.21 | 0.56 to 3.85 | 94.1 | <0.001 |
| Goicoechea et al. 2010 | 1.81 | 0.11 to 3.51 | 93.4 | <0.001 |
| Golmohammadi et al. 2017 | 1.80 | 0.09 to 3.51 | 95.4 | <0.001 |
| | Hosoya et al. 2014 | | --- | | 2.08 | 0.39 to 3.78 | 95.5 | <0.001 |
| Kao et al. 2011 | 2.14 | 1.12 to 4.74 | 96.3 | <0.001 |
| Kimura et al. 2018 | 2.11 | 0.37 to 3.85 | 95.2 | <0.001 |
| Mukri et al. 2018 | 2.11 | 0.43 to 3.79 | 95.5 | <0.001 |
| Perrenoud et al. 2020 | 1.98 | 0.31 to 3.65 | 95.6 | <0.001 |
| Saag et al. 2016 | 2.00 | 0.35 to 3.65 | 95.6 | <0.001 |
| Shi et al. 2011 | 2.17 | 0.53 to 3.81 | 95.5 | <0.001 |
| Sircar et al. 2015 | 1.61 | 0.01 to 3.21 | 94.7 | <0.001 |
| Stack et al. 2021 | 2.42 | 0.79 to 4.04 | 95.5 | <0.001 |
| Tanaka et al. 2015 | 2.20 | 0.54 to 3.85 | 95.5 | <0.001 |
| Wen et. al. 2020 | 1.37 | 0.18 to 2.93 | 94.9 | <0.001 |
| * value for heterogeneity among studies assessed with Cochran’s Q test. | | | | |


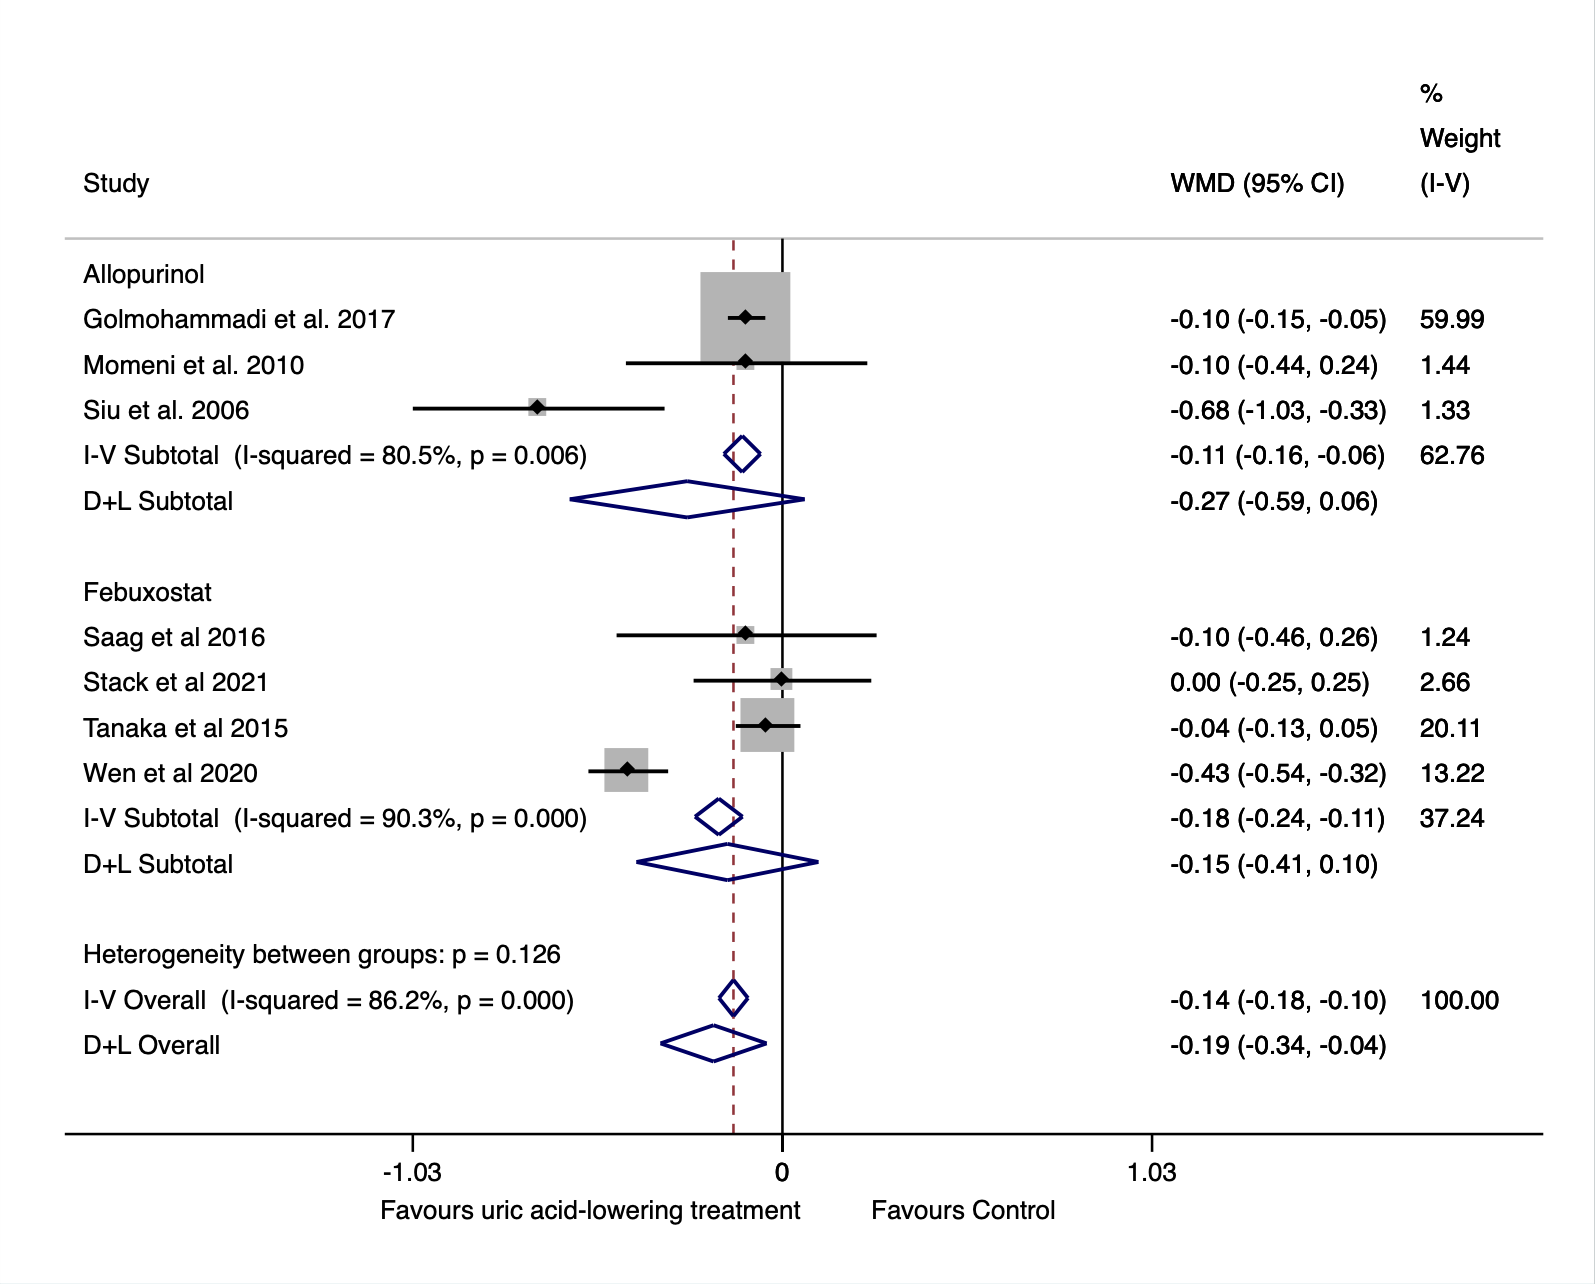


**Figure S1**. Effect of uric acid-lowering therapies on serum creatinine.


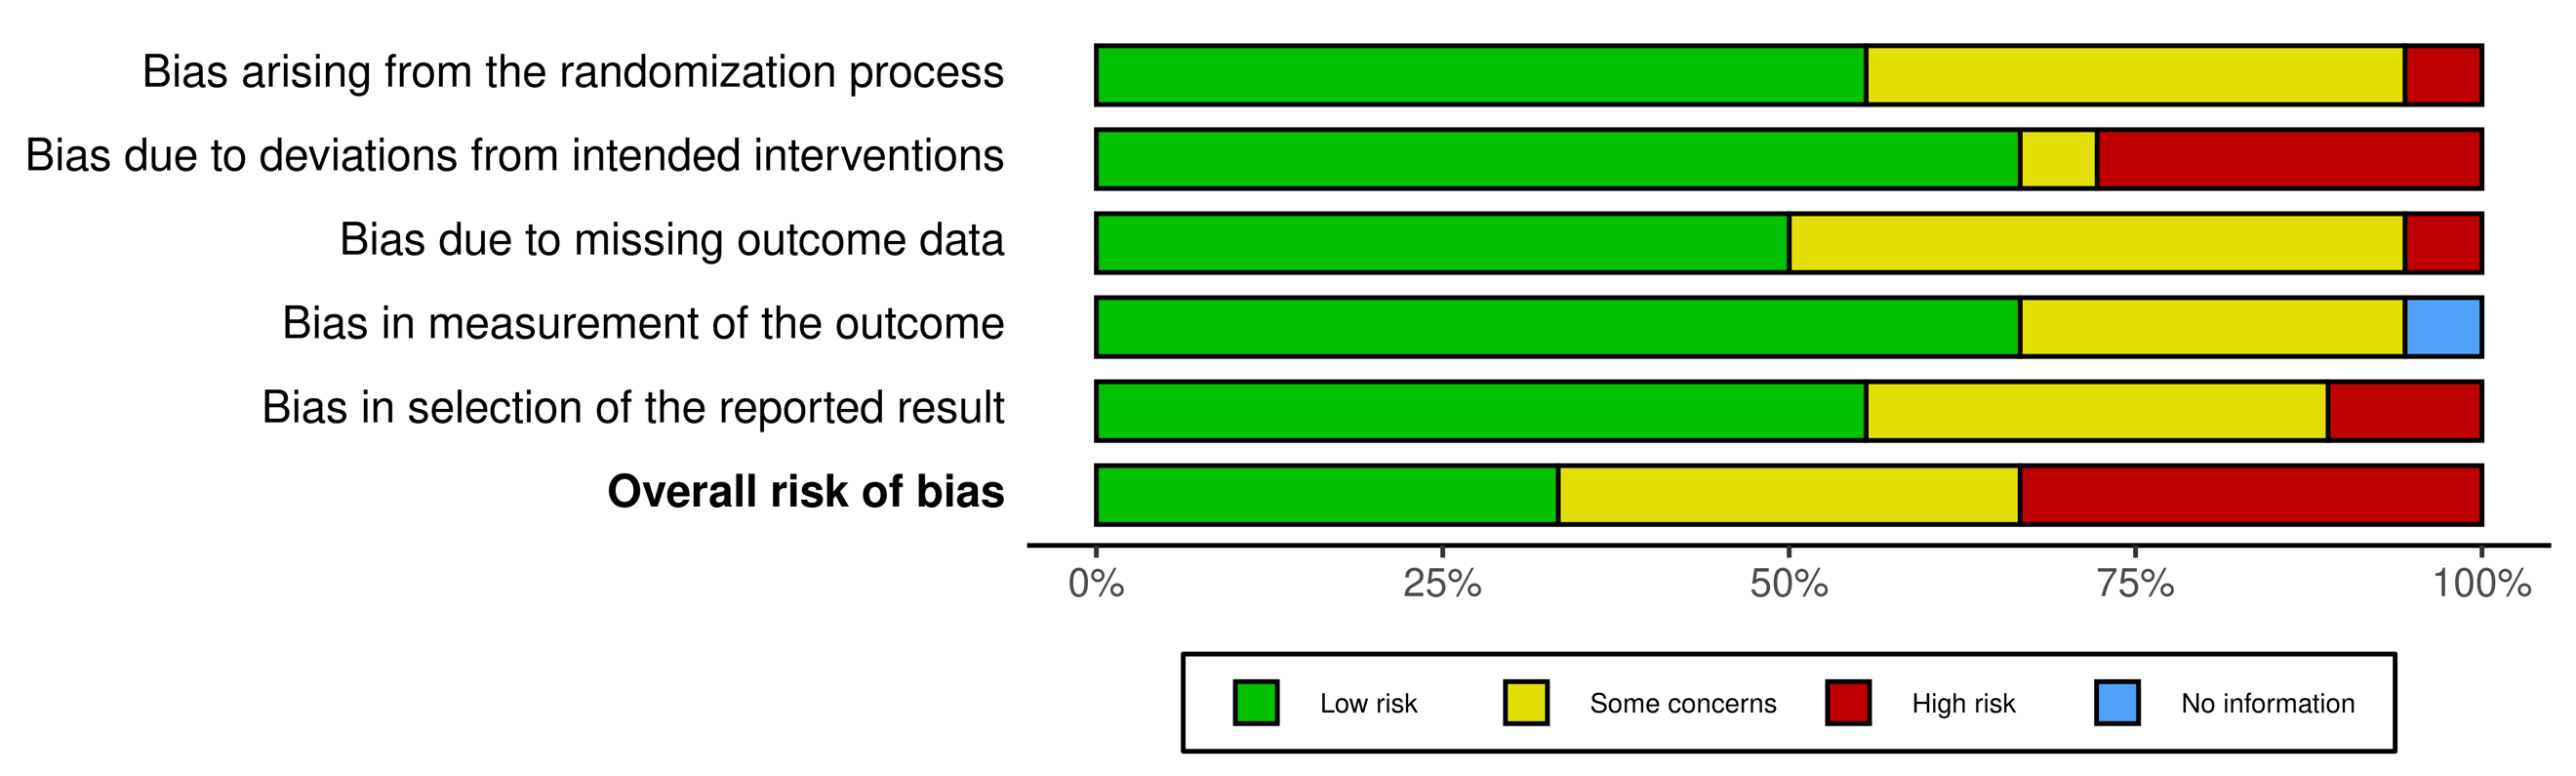


**Figure S2**. Quality assessment of the included studies in meta-analysis.
